# Supplementary material for: Automated manufacturing of segmented nanowires with thin ferromagnetic layers: a step towards miniature SFS Josephson junctions
Source: Royal Society of Chemistry journal article supplement (doi:10.1039/d4tc04751f), 2025-01-01
Supplement: d4tc04751f1.pdf [file d4tc04751f1.pdf]

## Supporting Information

# Automated Manufacturing of Segmented Nanowires with Thin Ferromagnetic Layers: a Step Towards Miniature SFS Josephson Junctions

*Stepan V. Sotnichuk<sup>a,b</sup>, Olga V. Skryabina<sup>b</sup>, Sergey E. Kushnir<sup>a</sup>, Dmitry N. Khmelenin<sup>c</sup>,  
Sergey V. Bakurskiy<sup>a,b</sup>, Vasily S. Stolyarov<sup>b</sup>, and Kirill S. Napolskii<sup>a,b</sup> \**

<sup>a</sup> Lomonosov Moscow State University, 119991, Moscow, Russia

<sup>b</sup> Moscow Institute of Physics and Technology, 141700, Dolgoprudny, Russia

<sup>c</sup> NRC Kurchatov Institute, 123098, Moscow, Russia

\* e-mail: [kirill@inorg.chem.msu.ru](mailto:kirill@inorg.chem.msu.ru)

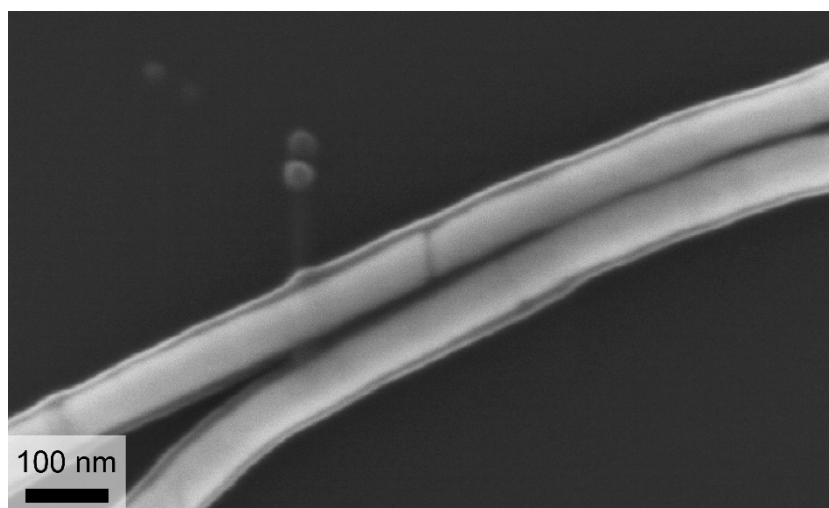

Figure S1. SEM image of individual segmented Au/Ni/Au nanowires covered by a thin layer of polyvinylpyrrolidone.

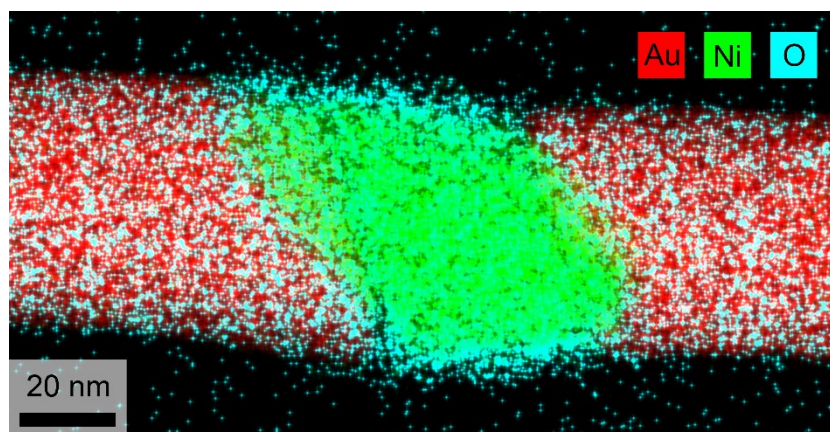

Figure S2. EDS elemental maps showing the local distribution of gold (red), nickel (green), and oxygen (blue) in Au/Ni/Au nanowires in the region of a ferromagnetic segment with a length of 46 nm. The data were obtained after a year-long storage of nanowires suspended in isopropanol.

## Superconducting transport in the SNFNS bridge

We consider the superconducting properties of the SNFNS nanowire bridge within the framework of the Usadel equations<sup>1</sup> in a semi-one-dimensional approach, similar to Refs.<sup>2,3</sup> We assume that the dirty limit condition is met for all metals, the critical temperature of the weak link materials is zero, and the nanowire diameter  $d$  is much less than the coherence length of the bulk normal metal,  $\xi_n = (\hbar D_n / 2\pi k_B T_c)^{1/2}$ , where  $D_n$  is the diffusion coefficient of normal metal N and  $T_c$  is the critical temperature of planar electrodes S.

Superconductivity in the system arises owing to the proximity effect between the superconducting electrode S and the normal layer N beneath it. The electronic structure of the N-layer regions under the S-electrode is described by the modified Usadel equation:

$$\xi_{eff}^2 \frac{\partial}{\partial x} \left( G_n^2 \frac{\partial \Phi_n}{\partial x} \right) - \Phi_n = -\delta \exp(i\chi),$$

$$\xi_{eff}^2 = \frac{\xi_n^2 \gamma_{BM}}{G_n(G_s + \gamma_{BM}\omega)}, \quad \delta = \frac{G_s \Delta}{(G_s + \gamma_{BM}\omega)}.$$

Here,  $\Phi_n$ ,  $F_n = \Phi_{n,\omega} / (\omega^2 + \Phi_{n,\omega} \Phi_{n,-\omega}^*)^{-1/2}$ ,  $G_n = \omega / (\omega^2 + \Phi_{n,\omega} \Phi_{n,-\omega}^*)^{-1/2}$ , and  $G_s = \omega / (\omega^2 + \Delta^2)^{-1/2}$  are the Usadel Green's functions,  $\omega = (2n + 1)T/T_c$  are the Matsubara frequencies normalized by  $\pi T_c$ ,  $\gamma_{BM}$  is the boundary parameter at the SN interface,  $x$  is the coordinate normalized by  $\xi_n$ , and  $\Delta$  is the modulus of the order parameter in the S electrode normalized by  $\pi k_B T_c$ .

The region between the S electrodes is described as:

$$\xi_n^2 \frac{\partial}{\partial x} \left( G_n^2 \frac{\partial \Phi_n}{\partial x} \right) - \omega G_n \Phi_n = 0,$$

$$\xi_f^2 \frac{\partial}{\partial x} \left( G_f^2 \frac{\partial \Phi_f}{\partial x} \right) - \tilde{\omega} G_f \Phi_f = 0.$$

for the N and F parts of the nanowire, respectively, with boundary conditions<sup>4</sup> at the NF and FN interfaces

$$\pm \gamma_B \xi_n G_n \frac{d}{dx} \Phi_n = G_f \left( \frac{\omega}{\tilde{\omega}} \Phi_f - \Phi_n \right),$$

$$\mp \gamma_B \gamma \xi_f G_f \frac{d}{dx} \Phi_f = G_n \left( \frac{\tilde{\omega}}{\omega} \Phi_n - \Phi_f \right).$$

Here,  $\tilde{\omega}_p = \omega + iH$ , where  $H$  is the exchange energy of the F-layer normalized by  $\pi T_c$ .  $\gamma_B = R_B A_B / \rho_n \xi_n$  and  $\gamma = \rho_n \xi_n / \rho_f \xi_f$  are the suppression parameters of the interface, where  $\xi_n$ ,  $\xi_f$ ,  $\rho_n$ , and  $\rho_f$  represent the coherence lengths and resistivities of the N and F materials,

respectively.  $R_B$  and  $A_B$  are the resistance and cross-sectional area of the corresponding interface, respectively.

The current in the N-part of the nanowire is

$$I = \frac{\pi k_B T A_B}{2e \xi_n \rho_n} \sum_{-\infty}^{\infty} \frac{G_n^2}{\omega^2} \left( \Phi_{n,-\omega}^* \frac{\partial \Phi_{n,\omega}}{\partial x} - \Phi_{n,\omega} \frac{\partial \Phi_{n,-\omega}^*}{\partial x} \right).$$

In some specific cases, the dirty limit is not applicable to the system. This can make the problem more complex and require the solution of a hybrid boundary problem involving the Usadel and Eilenberger equations.<sup>5,6</sup>

## References

- 1 K. D. Usadel, *Phys. Rev. Lett.*, 1970, **25**, 507–509.
- 2 I. I. Soloviev, S. V. Bakurskiy, V. I. Ruzhickiy, N. V. Klenov, M. Y. Kupriyanov, A. A. Golubov, O. V. Skryabina and V. S. Stolyarov, *Phys. Rev. Appl.*, 2021, **16**, 044060.
- 3 V. Ruzhickiy, S. Bakurskiy, M. Kupriyanov, N. Klenov, I. Soloviev, V. Stolyarov and A. Golubov, *Nanomaterials*, 2023, **13**, 1873.
- 4 M. Y. Kupriyanov and V. Lukichev, *Sov. Phys. JETP*, 1988, **67**, 1163-1168.
- 5 N. Pugach, M. Y. Kupriyanov, E. Goldobin, R. Kleiner and D. Koelle, *Phys. Rev. B*, 2011, **84**, 144513.
- 6 S. Bakurskiy, A. A. Golubov, M. Y. Kupriyanov, K. Yada and Y. Tanaka, *Phys. Rev. B*, 2014, **90**, 064513.
